# Supplementary material
Source: PubMed Central journal article supplement (PMC2613659)
Supplement: tpc.108.061721_1.pdf [file tpc.108.061721_1.pdf]

Supplemental Data González-Lamothe et al. (2008) The Transcriptional Activator Pti4 Is Required for the Recruitment of a Repressosome Nucleated by Repressor SEBF at the Potato *PR-10a* Gene

```

st Pti4: MDQQLPEINFPVDFPVYRRNSSFSRLIPCLTEHWGDLPLKVDDSEDMVIYGLLKDALSVGWSFFSTAGEVKSEPREETESLPEFVPSFVETTAAPAAETPKGRHYRGVRC : 111
sl Pti4: MDQQLPEINFPVDFPVYRRNSSFSRLIPCLTEHWGDLPLKVDDSEDMVIYGLLKDALSVGWSFFSTAGEVKSEPREETESLPEFVPSFVETTAAPAAETPKGRHYRGVRC : 111

st Pti4: RPWGKFAAEIRDPAKNGARVWLGTYETAEEAAIAYDKAAYMRGSKAHLNFPHRIGLNEPEPVRVTAKRRASPEFVSSSENGSMKRRRKAVKCDGCVESRSSAIQIGCQI : 222
sl Pti4: RPWGKFAAEIRDPAKNGARVWLGTYETAEEAAIAYDKAAYMRGSKAHLNFPHRIGLNEPEPVRVTAKRRASPEFVSSSENGSMKRRRKAVKCDGCVESRSSVMQVGCQI : 222

st Pti4: EQLTGVHQLLVI : 234
sl Pti4: EQLTGVHQLLVI : 234

```

**Supplemental Figure 1. Protein Sequence Alignment between Tomato and Potato Pti4.**

Protein sequence comparison between potato St Pti4 and tomato Sl Pti4 was performed using CLUSTALW software (Thompson et al., 1994) and edited using the GeneDoc program. Black shading indicates that a residue is conserved in both sequences. The bar above the sequences indicates the position of the ERF motif.

Nicolas, K.B., and Nicolas, H.B. GeneDoc: a tool for editing and annotating multiple sequence alignment; <http://www.psc.edu/biomed/genedoc>.

Thompson, J.D., Higgins, D.G., and Gibson, T.J. (1994). CLUSTAL W: Improving the sensitivity of progressive multiple sequence alignment through sequence weighting, position-specific gap penalties and weight matrix choice. *Nucleic Acids Res.* **22**, 4673-4680.

|            |                | Exp 1    | Exp 2    | Exp 3    | Average 2E $\Delta$ Ct | SD 2E $\Delta$ Ct  |
|------------|----------------|----------|----------|----------|------------------------|--------------------|
| WT-U Why1  | PR10 Ct        | 31.37804 | 29.33421 | 30.24562 |                        |                    |
|            | Actin Ct       | 35.25327 | 33.77821 | 34.89632 |                        |                    |
|            | $\Delta$ Ct    | 3.87523  | 4.444    | 4.6507   |                        |                    |
|            | 2E $\Delta$ Ct | 14.67    | 21.77    | 25.11    | <b>20.51666667</b>     | <b>5.331653902</b> |
| WT-U SEBF  | PR10 Ct        | 21.64085 | 22.55351 | 22.40737 |                        |                    |
|            | Actin Ct       | 32.89126 | 33.98562 | 35.01739 |                        |                    |
|            | $\Delta$ Ct    | 11.25041 | 11.43211 | 12.21002 |                        |                    |
|            | 2E $\Delta$ Ct | 2436.19  | 2763.17  | 4737.86  | <b>3312.406667</b>     | <b>1245.257758</b> |
| WT-U Pti4  | PR10 Ct        | 20.93902 | 19.62159 | 23.42584 |                        |                    |
|            | Actin Ct       | 32.87523 | 31.71806 | 34.82645 |                        |                    |
|            | $\Delta$ Ct    | 11.93621 | 12.09647 | 11.40061 |                        |                    |
|            | 2E $\Delta$ Ct | 3918.84  | 4379.26  | 2703.5   | <b>3667.2</b>          | <b>865.7568432</b> |
| WT-W Why1  | PR10 Ct        | 24.85135 | 23.68054 | 23.94752 |                        |                    |
|            | Actin Ct       | 35.37766 | 35.00201 | 34.88123 |                        |                    |
|            | $\Delta$ Ct    | 10.52631 | 11.32147 | 10.93371 |                        |                    |
|            | 2E $\Delta$ Ct | 1474.81  | 2559.12  | 1956.03  | <b>1996.653333</b>     | <b>543.2952562</b> |
| WT-W SEBF  | PR10 Ct        | 24.11711 | 29.48868 | 27.96593 |                        |                    |
|            | Actin Ct       | 30.89002 | 35.99157 | 34.6655  |                        |                    |
|            | $\Delta$ Ct    | 6.77291  | 6.50289  | 6.69957  |                        |                    |
|            | 2E $\Delta$ Ct | 109.36   | 90.69    | 103.94   | <b>101.33</b>          | <b>9.604754031</b> |
| WT-W Pti4  | PR10 Ct        | 26.55533 | 22.76632 | 28.28434 |                        |                    |
|            | Actin Ct       | 33.4583  | 29.76921 | 34.98715 |                        |                    |
|            | $\Delta$ Ct    | 6.90297  | 7.00289  | 6.70281  |                        |                    |
|            | 2E $\Delta$ Ct | 119.67   | 128.26   | 104.17   | <b>117.3666667</b>     | <b>12.20905538</b> |
| WT-E Why1  | PR10 Ct        | 17.16795 | 24.05903 | 22.54951 |                        |                    |
|            | Actin Ct       | 28.96348 | 35.85911 | 35.00561 |                        |                    |
|            | $\Delta$ Ct    | 11.79653 | 11.80008 | 12.4561  |                        |                    |
|            | 2E $\Delta$ Ct | 3557.21  | 3565.97  | 5619.01  | <b>4247.396667</b>     | <b>1187.860066</b> |
| WT-E SEBF  | PR10 Ct        | 23.66904 | 20.61982 | 27.91585 |                        |                    |
|            | Actin Ct       | 30.15827 | 27.02021 | 34.6248  |                        |                    |
|            | $\Delta$ Ct    | 6.48923  | 6.40039  | 6.70895  |                        |                    |
|            | 2E $\Delta$ Ct | 89.84    | 84.47    | 104.62   | <b>92.97666667</b>     | <b>10.43477998</b> |
| WT-E Pti4  | PR10 Ct        | 28.50038 | 28.10748 | 27.93515 |                        |                    |
|            | Actin Ct       | 34.48261 | 34.00731 | 33.95047 |                        |                    |
|            | $\Delta$ Ct    | 5.98223  | 5.89983  | 6.01532  |                        |                    |
|            | 2E $\Delta$ Ct | 63.22    | 59.71    | 64.68    | <b>62.53666667</b>     | <b>2.554492774</b> |
| #5-U SEBF  | PR10 Ct        | 24.18392 | 23.44011 | 24.22214 |                        |                    |
|            | Actin Ct       | 28.45063 | 28.178   | 29.11998 |                        |                    |
|            | $\Delta$ Ct    | 4.26671  | 4.73789  | 4.89784  |                        |                    |
|            | 2E $\Delta$ Ct | 19.25    | 26.68    | 29.81    | <b>25.24666667</b>     | <b>5.423949975</b> |
| #5-U Pti4  | PR10 Ct        | 23.88816 | 29.83268 | 29.31684 |                        |                    |
|            | Actin Ct       | 28.9902  | 35.23365 | 35.02943 |                        |                    |
|            | $\Delta$ Ct    | 5.10204  | 5.40097  | 5.71259  |                        |                    |
|            | 2E $\Delta$ Ct | 34.35    | 42.25    | 52.44    | <b>43.01333333</b>     | <b>9.069125279</b> |
| #14-U SEBF | PR10 Ct        | 25.14659 | 28.36627 | 23.59425 |                        |                    |
|            | Actin Ct       | 31.67782 | 35.05601 | 29.90337 |                        |                    |
|            | $\Delta$ Ct    | 6.53123  | 6.68974  | 6.30912  |                        |                    |
|            | 2E $\Delta$ Ct | 92.49    | 103.23   | 79.29    | <b>91.67</b>           | <b>11.99104666</b> |
| #14-U Pti4 | PR10 Ct        | 27.06047 | 27.3171  | 22.66439 |                        |                    |
|            | Actin Ct       | 32.55657 | 33.38233 | 29.00446 |                        |                    |
|            | $\Delta$ Ct    | 5.4961   | 6.06523  | 6.34007  |                        |                    |
|            | 2E $\Delta$ Ct | 45.13    | 66.96    | 81.01    | <b>64.36666667</b>     | <b>18.08003411</b> |

Supplemental Figure 2. Data from the ChIP Experiments of Figure 4B.

|          |                | Exp 1    | Exp 2    | Average 2E $\Delta$ Ct | SD 2E $\Delta$ Ct  |
|----------|----------------|----------|----------|------------------------|--------------------|
| PVX-00#1 | PR10 Ct        | 16.55307 | 20.24065 |                        |                    |
| SEBF     | Actin Ct       | 27.38911 | 31.56322 |                        |                    |
|          | $\Delta$ Ct    | 10.83604 | 11.32257 |                        |                    |
|          | 2E $\Delta$ Ct | 1827.99  | 2561.14  | <b>2194.565</b>        | <b>518.4153366</b> |
| PVX-00#1 | PR10 Ct        | 17.468   | 19.81824 |                        |                    |
| Pti4     | Actin Ct       | 28.37006 | 31.44671 |                        |                    |
|          | $\Delta$ Ct    | 10.90206 | 11.62847 |                        |                    |
|          | 2E $\Delta$ Ct | 1913.58  | 3166.05  | <b>2539.815</b>        | <b>885.6300302</b> |
| VIGS#1   | PR10 Ct        | 28.6722  | 25.85549 |                        |                    |
| SEBF     | Actin Ct       | 33.99715 | 30.68479 |                        |                    |
|          | $\Delta$ Ct    | 5.32495  | 4.82934  |                        |                    |
|          | 2E $\Delta$ Ct | 40.08    | 28.43    | <b>28.43</b>           | <b>8.237794001</b> |
| VIGS#1   | PR10 Ct        | 24.64282 | 22.32973 |                        |                    |
| Pti4     | Actin Ct       | 29.11485 | 27.03207 |                        |                    |
|          | $\Delta$ Ct    | 4.47203  | 4.70234  |                        |                    |
|          | 2E $\Delta$ Ct | 22.19    | 26.03    | <b>24.11</b>           | <b>2.71529004</b>  |
| VIGS#2   | PR10 Ct        | 28.14033 | 29.17724 |                        |                    |
| SEBF     | Actin Ct       | 32.44661 | 32.97134 |                        |                    |
|          | $\Delta$ Ct    | 4.30628  | 3.7941   |                        |                    |
|          | 2E $\Delta$ Ct | 19.78    | 13.87    | <b>16.825</b>          | <b>4.179001077</b> |
| VIGS#2   | PR10 Ct        | 27.30008 | 25.2324  |                        |                    |
| Pti4     | Actin Ct       | 30.99789 | 28.15387 |                        |                    |
|          | $\Delta$ Ct    | 3.69781  | 2.92147  |                        |                    |
|          | 2E $\Delta$ Ct | 12.98    | 7.58     | <b>10.28</b>           | <b>3.818376618</b> |

**Supplemental Figure 3. Data from the ChIP Experiments of Figure 6B.**

**Supplemental Table 1. Sequence of the Primers Used for Constructing the Protein Fusions Analyzed in Yeast Two-Hybrid Assays.**

| <b>Oligonucleotide name</b>                    | <b>Sequence (5'-3')</b>         |
|------------------------------------------------|---------------------------------|
| Oligo 1 (SEBF fragments 1 to 4) sense          | TTTTGTTCGGATCCTAACCCCTTC        |
| Oligo 2 (SEBF fragments 5 to 7) antisense      | CTCCTGGACCCTCGAGCCTTTTCTC       |
| Oligo 3 (SEBF fragments 1 and 10) antisense    | GACGAGCTCGAGCTCAATTACACGGATG    |
| Oligo 4 (SEBF fragments 2 and 9) antisense     | ACGTAGACTCGAGTGGATCAGTCCATACTC  |
| Oligo 5 (SEBF fragments 3 and 8) antisense     | GGCTCGAGCTGGCCCTCAATTCACCCTCAG  |
| Oligo 6 (SEBF fragment 4) antisense            | CAAAGACTCGAGGGTCTCAATTGGCATTAC  |
| Oligo 7 (SEBF fragments 5, 8, 9 and 10) sense  | ATGGGATCCTGACCTTAAAATCTTTGTTG   |
| Oligo 8 (SEBF fragment 6) sense                | GGGATCCCTGGGCCAGCACCACCCAAAAG   |
| Oligo 9 (SEBF fragment 7) sense                | GGGAGGATCCACAGTTCCAACAGAGTCTAC  |
| Oligo 14 (Pti4 fragments 1 to 3) sense         | GATATACTCGAGGATCAACAGTTACCAC    |
| Oligo 15 (Pti4 fragments 4 to 7) antisense     | GTGCTCGAGTCAGACCAATAGTTGATG     |
| Oligo 16 (Pti4 fragments 1, 8 to 10) antisense | CATTCAACTCGAGCCGTCACGGGAAATTC   |
| Oligo 17 (Pti4 fragment 2) antisense           | GTCTAACTCGAGTTCAATGTCTTCCCTTC   |
| Oligo 18 (Pti4 fragment 3) antisense           | CACCGGCTCGAGTACTCATTACAGGCGCTG  |
| Oligo 19 (Pti4 fragments 4 and 8) sense        | ATCCCCTGTGAATTCGAAACATGGGGAG    |
| Oligo 20 (Pti4 5 fragments and 9) sense        | GCGCCTGAATTCGTACCTTCTCCGGTG     |
| Oligo 21 (Pti4 fragments 6, 10 and 11) sense   | GAAGGGAGAATTCTATAGAGGCGTTAGAC   |
| Oligo 22 (Pti4 fragment 7) sense               | CACATTTGGAATTCCTCCGACCCGGATC    |
| Oligo 23 (Pti4 fragment 11) antisense          | GTTTCCTCGAGCCGTTTCACGACGAGCTTAC |
